# Supplementary material for: Tree Physiological Variables as a Proxy of Heavy Metal and Platinum Group Elements Pollution in Urban Areas
Source: MDPI journal article supplement (doi:10.3390/biology12091180), 2023-08-29
Supplement: s1 [file s1]

**Table S1.** Coordinates and concentrations of metals, and PGEs (ng g<sup>-1</sup> except Cu, Mn and Zn in ug g<sup>-1</sup>) plus physiological variables (index values) for each of the 50 trees studied in Logroño (La Rioja, Spain).

| ID | X      | Y       | Chl | Flav  | Fv/Fm | As    | Cd   | Cu   | Hg   | Mn    | Ni     | Pb    | Pd    | Rh   | Sb    | V     | Zn    | N   | δ <sup>15</sup> N |
|----|--------|---------|-----|-------|-------|-------|------|------|------|-------|--------|-------|-------|------|-------|-------|-------|-----|-------------------|
| 1  | 543128 | 4702092 | 27  | 1.310 | 0.800 | 35.0  | 25.2 | 8.7  | 5.4  | 64.3  | 431.4  | 124.9 | 161.7 | 4.0  | 34.3  | 131.8 | 45.2  | 1.5 | 5.4               |
| 2  | 543303 | 4702090 | 38  | 1.098 | 0.810 | 38.8  | 14.2 | 10.8 | 12.4 | 86.5  | 454.1  | 160.1 | 253.3 | 5.9  | 36.1  | 127.5 | 77.8  | 1.8 | 6.4               |
| 3  | 543617 | 4702042 | 36  | 1.422 | 0.805 | 99.3  | 20.5 | 7.6  | 13.0 | 65.2  | 232.7  | 153.4 | 91.4  | 2.2  | 18.5  | 110.1 | 38.1  | 1.9 | 8.8               |
| 4  | 544515 | 4702241 | 34  | 1.924 | 0.718 | 123.1 | 22.5 | 4.0  | 16.5 | 105.0 | 143.1  | 202.2 | 107.2 | 2.5  | 28.5  | 134.7 | 33.3  | 1.2 | 5.2               |
| 5  | 544930 | 4702309 | 30  | 1.535 | 0.762 | 138.9 | 13.3 | 5.7  | 19.1 | 69.3  | 243.2  | 255.7 | 118.6 | 2.6  | 60.4  | 126.2 | 52.6  | 1.0 | 5.9               |
| 6  | 545517 | 4702282 | 37  | 1.329 | 0.806 | 181.7 | 90.8 | 11.6 | 17.8 | 42.3  | 390.0  | 409.2 | 184.2 | 4.3  | 98.9  | 154.0 | 149.2 | 1.9 | 8.1               |
| 7  | 545875 | 4702303 | 30  | 1.248 | 0.814 | 118.8 | 7.6  | 14.9 | 9.2  | 43.5  | 384.0  | 102.8 | 121.0 | 2.7  | 26.9  | 71.1  | 114.6 | 2.0 | 1.7               |
| 8  | 546434 | 4702047 | 33  | 1.386 | 0.797 | 160.7 | 12.0 | 10.2 | 20.3 | 73.1  | 293.4  | 251.4 | 141.2 | 3.1  | 134.5 | 174.2 | 77.5  | 1.8 | 6.5               |
| 9  | 546809 | 4702272 | 33  | 1.340 | 0.817 | 149.6 | 62.7 | 10.3 | 16.1 | 117.6 | 419.4  | 222.6 | 190.7 | 4.5  | 27.6  | 109.8 | 99.2  | 1.4 | 7.4               |
| 10 | 547133 | 4701775 | 41  | 1.445 | 0.778 | 145.3 | 48.4 | 8.1  | 17.7 | 120.4 | 339.7  | 271.8 | 127.9 | 3.0  | 163.7 | 153.8 | 58.6  | 1.5 | 8.0               |
| 11 | 542958 | 4701637 | 37  | 1.276 | 0.811 | 107.5 | 23.6 | 10.6 | 13.4 | 108.5 | 373.3  | 150.0 | 662.2 | 14.2 | 36.8  | 154.7 | 69.7  | 1.7 | 4.3               |
| 12 | 543217 | 4701647 | 33  | 1.293 | 0.790 | 38.8  | 29.8 | 8.8  | 9.2  | 43.8  | 231.8  | 87.7  | 164.7 | 3.4  | 26.2  | 111.3 | 49.1  | 1.6 | 5.8               |
| 13 | 543874 | 4701659 | 28  | 1.701 | 0.759 | 38.7  | 3.5  | 5.5  | 14.2 | 102.1 | 123.2  | 108.8 | 126.6 | 2.8  | 21.6  | 79.9  | 39.7  | 1.0 | 4.3               |
| 14 | 544242 | 4701816 | 35  | 0.889 | 0.814 | 181.7 | 64.8 | 7.7  | 25.9 | 50.0  | 361.4  | 408.2 | 134.4 | 3.0  | 166.2 | 224.8 | 57.6  | 1.9 | 6.8               |
| 15 | 545092 | 4701680 | 38  | 0.816 | 0.813 | 123.7 | 15.6 | 10.3 | 19.6 | 76.8  | 382.5  | 294.1 | 98.2  | 2.3  | 173.3 | 141.3 | 39.3  | 2.2 | 10.7              |
| 16 | 545411 | 4701564 | 41  | 0.653 | 0.815 | 178.0 | 43.9 | 19.8 | 14.1 | 65.5  | 417.3  | 241.9 | 82.4  | 1.9  | 53.2  | 148.0 | 53.6  | 2.6 | 10.1              |
| 17 | 545911 | 4701566 | 41  | 0.732 | 0.814 | 145.1 | 21.4 | 16.2 | 13.3 | 76.2  | 417.4  | 399.3 | 87.7  | 2.1  | 93.8  | 160.2 | 35.2  | 2.5 | 11.0              |
| 18 | 546342 | 4701680 | 35  | 0.696 | 0.810 | 115.4 | 45.7 | 10.0 | 23.1 | 175.8 | 1104.8 | 359.1 | 125.5 | 3.1  | 87.8  | 181.1 | 36.8  | 2.4 | 10.6              |
| 19 | 546855 | 4701641 | 44  | 0.758 | 0.809 | 149.3 | 15.9 | 7.4  | 27.8 | 122.5 | 604.6  | 387.2 | 105.8 | 2.9  | 108.0 | 223.7 | 31.0  | 2.4 | 10.4              |
| 20 | 547061 | 4701555 | 44  | 1.145 | 0.795 | 90.5  | 46.1 | 11.5 | 23.4 | 112.7 | 350.9  | 259.3 | 167.4 | 4.3  | 146.6 | 226.9 | 138.0 | 1.4 | 5.7               |
| 21 | 542501 | 4700970 | 36  | 1.468 | 0.808 | 97.8  | 3.4  | 4.5  | 12.6 | 34.7  | 98.4   | 162.6 | 130.8 | 3.1  | 55.8  | 138.4 | 42.2  | 0.8 | 4.8               |
| 22 | 543499 | 4701188 | 36  | 1.298 | 0.805 | 82.1  | 29.0 | 6.1  | 29.3 | 134.7 | 180.5  | 223.2 | 160.4 | 3.9  | 63.2  | 204.2 | 153.9 | 1.1 | -0.5              |
| 23 | 544091 | 4701269 | 40  | 1.468 | 0.818 | 93.0  | 32.1 | 8.4  | 25.8 | 65.2  | 168.7  | 435.7 | 97.7  | 2.6  | 107.7 | 172.5 | 115.6 | 1.0 | 2.0               |
| 24 | 544265 | 4701162 | 35  | 1.800 | 0.770 | 35.0  | 18.3 | 5.4  | 19.0 | 67.8  | 148.8  | 256.0 | 63.1  | 1.5  | 89.9  | 123.3 | 70.2  | 1.0 | -1.5              |
| 25 | 544831 | 4701302 | 33  | 0.840 | 0.820 | 135.7 | 43.3 | 12.5 | 13.7 | 90.0  | 643.5  | 234.7 | 78.0  | 1.6  | 87.9  | 161.9 | 60.8  | 2.8 | 12.0              |

|    |        |         |    |       |       |       |       |      |      |       |       |       |       |     |       |       |       |     |      |
|----|--------|---------|----|-------|-------|-------|-------|------|------|-------|-------|-------|-------|-----|-------|-------|-------|-----|------|
| 26 | 545316 | 4701155 | 39 | 1.068 | 0.792 | 105.7 | 33.5  | 11.3 | 12.2 | 51.9  | 273.5 | 228.5 | 56.1  | 1.3 | 98.7  | 150.7 | 47.2  | 2.3 | 9.3  |
| 27 | 545747 | 4701144 | 39 | 0.623 | 0.822 | 89.3  | 19.2  | 12.2 | 12.7 | 55.1  | 378.4 | 233.8 | 75.5  | 1.6 | 82.0  | 162.3 | 56.7  | 2.6 | 11.6 |
| 28 | 546303 | 4701099 | 40 | 0.810 | 0.814 | 94.4  | 11.7  | 10.7 | 15.2 | 88.7  | 299.4 | 308.9 | 172.8 | 3.5 | 142.9 | 204.7 | 36.6  | 2.2 | 8.1  |
| 29 | 546759 | 4701328 | 46 | 1.273 | 0.816 | 105.1 | 26.4  | 11.8 | 12.7 | 61.9  | 336.3 | 230.5 | 61.2  | 1.7 | 98.7  | 170.9 | 66.9  | 2.4 | 12.2 |
| 30 | 547739 | 4700961 | 36 | 1.889 | 0.754 | 37.1  | 23.7  | 4.1  | 18.8 | 35.2  | 161.6 | 200.5 | 112.3 | 2.9 | 99.3  | 135.9 | 53.0  | 1.0 | 5.9  |
| 31 | 542805 | 4700916 | 45 | 1.170 | 0.814 | 88.2  | 3.4   | 6.4  | 34.7 | 91.3  | 269.5 | 254.0 | 128.1 | 3.0 | 110.2 | 219.7 | 30.9  | 1.4 | 7.2  |
| 32 | 543301 | 4700672 | 32 | 1.782 | 0.776 | 74.4  | 7.6   | 6.7  | 30.3 | 43.3  | 153.1 | 191.5 | 297.1 | 6.9 | 67.4  | 162.4 | 99.3  | 0.8 | -0.4 |
| 33 | 543648 | 4700826 | 27 | 1.887 | 0.688 | 36.5  | 3.3   | 6.3  | 23.5 | 38.2  | 119.9 | 164.8 | 136.9 | 3.3 | 57.7  | 131.1 | 42.6  | 0.8 | 0.3  |
| 34 | 544237 | 4700455 | 33 | 1.749 | 0.737 | 37.5  | 14.3  | 4.9  | 15.2 | 38.4  | 88.1  | 144.1 | 90.8  | 2.2 | 66.8  | 112.5 | 54.8  | 0.8 | 2.8  |
| 35 | 545124 | 4700616 | 38 | 0.731 | 0.816 | 37.0  | 22.2  | 12.4 | 16.4 | 97.1  | 902.3 | 300.2 | 151.9 | 3.5 | 217.0 | 195.4 | 63.7  | 2.3 | 10.7 |
| 36 | 545305 | 4700612 | 24 | 0.904 | 0.830 | 38.1  | 123.9 | 11.3 | 14.3 | 117.7 | 523.8 | 225.6 | 112.3 | 2.6 | 82.2  | 186.8 | 60.0  | 2.2 | 9.9  |
| 37 | 545707 | 4700612 | 42 | 1.154 | 0.822 | 37.5  | 33.6  | 7.7  | 11.7 | 154.1 | 481.1 | 164.2 | 103.8 | 2.5 | 46.5  | 97.4  | 56.4  | 2.1 | 9.6  |
| 38 | 546161 | 4700992 | 36 | 0.937 | 0.812 | 107.8 | 19.9  | 9.9  | 19.2 | 86.7  | 701.1 | 266.6 | 77.2  | 1.8 | 54.4  | 141.3 | 37.2  | 2.2 | 8.9  |
| 39 | 546551 | 4700663 | 40 | 1.200 | 0.800 | 81.4  | 31.9  | 3.5  | 28.7 | 60.6  | 183.3 | 236.4 | 116.6 | 2.9 | 102.1 | 186.8 | 22.4  | 1.2 | 7.0  |
| 40 | 547532 | 4700650 | 35 | 1.570 | 0.797 | 148.4 | 9.2   | 3.1  | 21.6 | 57.7  | 157.1 | 192.6 | 75.5  | 1.8 | 87.9  | 153.9 | 21.0  | 1.4 | 5.6  |
| 41 | 543296 | 4700251 | 36 | 1.484 | 0.811 | 90.4  | 41.3  | 11.6 | 7.1  | 63.1  | 449.5 | 167.8 | 119.5 | 3.1 | 45.2  | 226.5 | 108.2 | 2.3 | 7.4  |
| 42 | 543466 | 4700204 | 33 | 1.187 | 0.796 | 38.5  | 29.1  | 13.6 | 11.8 | 47.6  | 365.7 | 135.2 | 197.4 | 5.0 | 61.2  | 167.9 | 91.9  | 2.1 | 5.1  |
| 43 | 543939 | 4700315 | 45 | 1.229 | 0.797 | 38.3  | 23.8  | 5.1  | 26.5 | 129.6 | 156.6 | 207.0 | 170.2 | 4.0 | 145.4 | 161.6 | 29.5  | 1.4 | 5.4  |
| 44 | 544328 | 4700146 | 37 | 1.056 | 0.812 | 38.2  | 14.2  | 8.5  | 8.6  | 107.3 | 376.9 | 151.4 | 97.1  | 2.2 | 55.0  | 145.3 | 46.3  | 2.0 | 8.1  |
| 45 | 544501 | 4700079 | 35 | 0.996 | 0.805 | 38.8  | 7.1   | 7.8  | 10.7 | 47.1  | 298.5 | 150.0 | 72.3  | 1.7 | 56.7  | 158.1 | 35.0  | 1.8 | 8.1  |
| 46 | 545187 | 4700147 | 39 | 1.033 | 0.830 | 91.8  | 24.3  | 14.9 | 7.9  | 87.7  | 561.0 | 94.6  | 274.7 | 6.2 | 33.6  | 86.8  | 46.4  | 2.6 | 9.8  |
| 47 | 545865 | 4700224 | 33 | 1.040 | 0.808 | 81.9  | 34.2  | 9.8  | 19.4 | 158.6 | 632.2 | 273.4 | 129.9 | 2.8 | 118.6 | 216.9 | 62.3  | 1.3 | 7.1  |
| 48 | 546517 | 4700032 | 31 | 1.714 | 0.725 | 38.5  | 44.5  | 4.3  | 22.3 | 38.3  | 124.9 | 188.5 | 66.2  | 1.6 | 57.9  | 186.5 | 51.1  | 0.9 | 2.6  |
| 49 | 547313 | 4700336 | 37 | 0.687 | 0.818 | 128.6 | 37.9  | 3.5  | 8.0  | 66.3  | 614.4 | 127.8 | 35.7  | 1.1 | 46.9  | 120.3 | 28.7  | 2.6 | 10.1 |
| 50 | 547350 | 4700228 | 40 | 1.032 | 0.803 | 132.6 | 18.7  | 11.0 | 12.6 | 112.4 | 519.1 | 306.0 | 105.6 | 2.6 | 199.2 | 181.7 | 47.9  | 2.1 | 7.0  |
